# Supplementary material for: Expression and activity of the calcitonin receptor family in a sample of primary human high-grade gliomas
Source: Springer Nature journal article supplement (doi:10.1186/s12885-019-5369-y), 2019-02-18

# Supplementary Figure 1

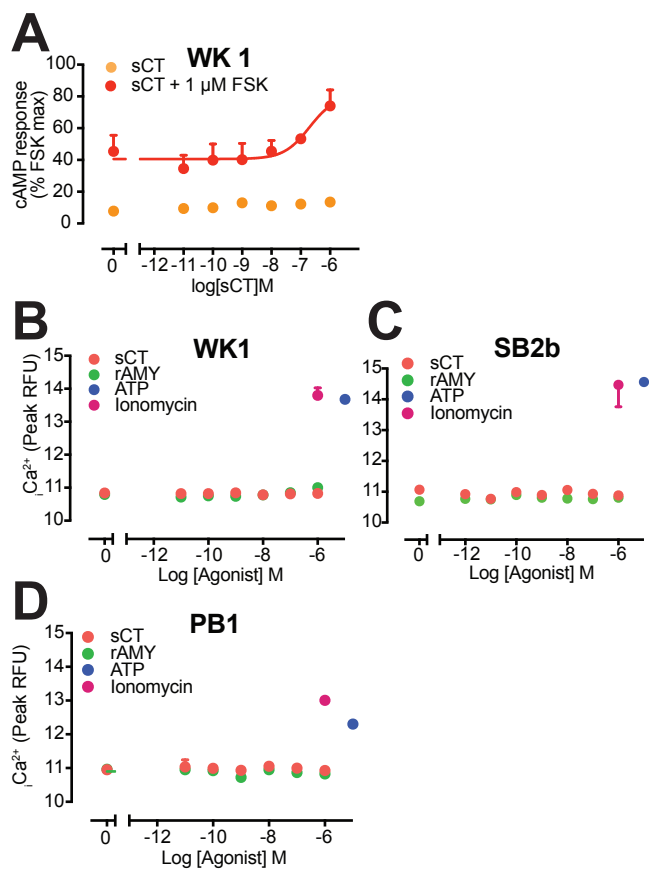

Supplement: MOESM2 [file 16488760]
