# Supplementary material for: Expression and activity of the calcitonin receptor family in a sample of primary human high-grade gliomas
Source: Springer Nature journal article supplement (doi:10.1186/s12885-019-5369-y), 2019-02-18
Supplement: MOESM4 [file 16488760]

|                                 |                                                                    |    |           |      |
|---------------------------------|--------------------------------------------------------------------|----|-----------|------|
| Xenopus_tropicalis              | -----MKMVSSDVRDKTVRKHVEHCFL-VIVVIRMVPGFAST---VDP-TLMPIVNEEY        | 50 | amphibian |      |
| Thamnophis_sirtalis             | -----MNKKSSG-YFLLIILLIRMAPSFPTTVSYVDP-TLESM--EYS                   | 39 | reptiles  |      |
| Anolis_carolinensis             | -----MDKKNNGCCLL-MILLIRMAPTLSSTVSYTDP-TLAPVATEHS                   | 41 |           |      |
| Serinus_canaria                 | -----MKKTQSCFLLI-ILLTRIVPSLSSAVNYTDT-TLEPVVTENS                    | 41 |           |      |
| Corvus_brachyrhynchos           | -----MKKTQSCFLLI-ILLTRIVPSLSSTVNYTDP-TLEPVVTENS                    | 41 |           |      |
| Ficedula_albicollis             | -----MKKTQTCFLLI-ILLTRIVPSLSSTVNYTDP-TLEPVVTENS                    | 41 |           |      |
| Anser_cygnoides_domesticus      | -----MKKTTHSCFLLI-ILLIRMVPSLTATVNYTDP-TLEPVVTENS                   | 41 |           |      |
| Anas_platyrhynchos              | -----MKKTTHGCFLLI-ILLIRMVPSLTATVNYTDP-TLEPVVTENS                   | 41 |           |      |
| Apteryx_australis_mantelli      | -----MKKTTHSCFLLI-ILLIRMVPSLTSTVNYTDP-TLEPVVTENS                   | 41 |           |      |
| Gallus_gallus                   | -----MKKTTHSCFLLI-ILLIRMVPSLTATVNYTDP-TLEPVVTENS                   | 41 |           |      |
| Picoides_pubescens              | -----MKKTTHGCFLLV-ILLIRMVPSLSSTVNYTDT-TLEPLVTENS                   | 41 |           |      |
| Chaetura_pelagica               | -----MKKTQSCILLI-ILLIRMVPSLSSTVNYTDP-TLEPVVTENS                    | 41 |           |      |
| Apaloderma_vittatum             | -----MKKRTHSCFLLI-ILLTRMVPSLSSTVNYTDP-TLEPVVTENS                   | 41 |           | aves |
| Balearica_regulorum_gibbericeps | -----MKKTTHSCFLLI-ILLIRMIPSLSSTVNYTDP-TLEPVVTENS                   | 41 |           |      |
| Cuculus_canorus                 | -----MKTTHSCFLLV-ILLIKMVPTLSSTVNYTDP-TLEPVVTENS                    | 41 |           |      |
| Caprimulgus_carolinensis        | -----MKKTTHSCFLL-IILLMRMVPSLSSTVNYTDP-TLEPVVTENS                   | 41 |           |      |
| Calypte_anna                    | -----MKKTAHSCILL-IILLIRMAPSLSSTVNYTDP-TLEPVVTENS                   | 41 |           |      |
| Pygoscelis_adeliae              | -----MKKTTHSCLLV-IILLIRMVPSLSSTVNYTDP-TLEPVVTENS                   | 41 |           |      |
| Egretta_garzetta                | -----MKKTTHICFLL-VILLIRMVPSLSSTVNYTDP-TLEPVVNENS                   | 41 |           |      |
| Nipponia_nippon                 | -----MKKVTHS-FLLIILLIRMVPSLSSTVNYTDP-TLEPVVTENS                    | 41 |           |      |
| Charadrius_vociferus            | -----MVPSLSSTVNYTDP-TLEPVVTENS                                     | 24 |           |      |
| Aquila_chrysaetos_canadensis    | -----MKKTTHSCFLLLIIFLTRMVPSLSSTVNYTDP-TLEPVVTENS                   | 42 |           |      |
| Phalacrocorax_carbo             | -----MVPSLSSTVNYTDP-TLEPVATENS                                     | 24 |           |      |
| Sus_scrofa                      | -----MRFTLTRWCLTLFIFLNRPLPVLPSADGAHTPTLEPEPFLYI                    | 43 | mammals   |      |
| Mus_musculus                    | -----MRFLLVNRF'TLLLLLLVSP'PVLQAPT'NL'TDS-GLDQEPFLYL                | 42 |           |      |
| Rattus_norvegicus               | MT'PRRSRMKRRNLRKPKMR'FLLLNR'F'TLLLLLLVSP'PVLQAPT'NL'TDS-GLDQEPFLYL | 59 |           |      |
| Jaculus_jaculus                 | -----MKLSLTLRVAGLFILLNQSPALPYFSNFTLPTNEPDEPFLYT                    | 43 |           |      |
| Pteropus_vampyrus               | -----MKFTLTRWCFVLFIFLNHPTPVLPTSSNNTYSPALESSEPFLYV                  | 43 |           |      |
| Cavia_porcellus                 | -----MRFTFTRQFLAFFILISNPASILPRESENTFP-TFEPEPYLYS                   | 42 |           |      |
| Galeopterus_variegatus          | -----MRLRVTCRLLALFVLLNHPTPILPAFSNQTFP-TLDSEPFYLYI                  | 42 |           |      |
| Oryctolagus_cuniculus           | MAHLPPSRMKRDLQKPKMF'TLTWRCFALFLLHQPTPVNPASSNDTHP-TVEPEPFLYV        | 59 |           |      |
| Colobus_angolensis_palliatus    | -----MKFTF'TSRCFALFLLNHPIPILPAFSNQTYP-TIEPEPFLYV                   | 42 |           |      |
| Homo_sapiens                    | -----MRFTF'TSRCLALFLLNHPTPILPAFSNQTYP-TIEPKPFLYV                   | 42 |           |      |
| Pan_troglodytes                 | -----MRFTF'TSRCLALFLLNHPTPILPAFSNQTYP-TIEPEPFLYV                   | 42 |           |      |
| Canis_lupus_familiaris          | -----MKFTLTRCLVLFIFLNHPTPVLPATSN'DTYPPNMESEPFLYV                   | 43 |           |      |
| Equus_caballus                  | -----MKFSLTRCLVLFIFLNHPTPILPASSNDTYPP'TIESEPFLYV                   | 43 |           |      |
| Ceratotherium_simum_simum       | -----MKFSLTRCLVLFIFLNHPTPILPATSN'DTYPP'TIESEPFLYV                  | 43 |           |      |

|                                        |                                                                |     |           |
|----------------------------------------|----------------------------------------------------------------|-----|-----------|
| <i>Xenopus_tropicalis</i>              | ISRQRIINSQFKCYEKMKKDSPYKSKGLYCNRTWDGWL CWDDTPAGINVTQNC PDYFPDF | 110 | amphibian |
| <i>Thamnophis_sirtalis</i>             | VIHQKIVDSQFKCYERMNRAPPYKKKGLYCNRTWDGWL CWDDTPAGEYADQNC PDYFQDF | 99  | reptiles  |
| <i>Anolis_carolinensis</i>             | AIPQKIVDSQFKCYERMNRTPPYKKKGLFCNRTWDGWL CWDDTPAGEFADQNC PDYFPDF | 101 |           |
| <i>Serinus_canaria</i>                 | VIRQKIIDSQFKCYERMNRAPPYKKKGLFCNRTWDGWL CWDDTPAGRLTAQNC PDYFPDF | 101 |           |
| <i>Corvus_brachyrhynchos</i>           | VIRQKIIDSQFKCYERMNRAPPYKKKGLFCNRTWDGWL CWDDTPAGRLTAQNC PDYFPDF | 101 |           |
| <i>Ficedula_albicollis</i>             | VIRQKIIDSQFKCYERMNRAPPYKKKGLFCNRTWDGWL CWDDTPAGRLTAQNC PDYFPDF | 101 |           |
| <i>Anser_cygnoides_domesticus</i>      | VIRQKIIDSQFKCYERMNRAPPYRKKGLFCNRTWDGWL CWDDTPAGRVTAQNC PDYFPDF | 101 |           |
| <i>Anas_platyrhynchos</i>              | VIRQKIIDSQFKCYERMNRAPPYRKKGLFCNRTWDGWL CWDDTPAGRITAQNC PDYFPDF | 101 |           |
| <i>Apteryx_australis_mantelli</i>      | VIRQKIIDSQFKCYERMNRAPPYRKKGLFCNRTWDGWL CWDDTPAGRITAQNC PDYFPDF | 101 |           |
| <i>Gallus_gallus</i>                   | VIRQKIIDSQFKCYERMNRAPPYRKKGLFCNRTWDGWL CWDDTPAGRITAQNC PDYFPDF | 101 |           |
| <i>Picoides_pubescens</i>              | VIRQKIIDSQFKCYERMNRAPPYKKKGLFCNRTWDGWL CWDDTPAGRITAQNC PDYFPDF | 101 |           |
| <i>Chaetura_pelagica</i>               | VIRQKIIDSQFKCYERMNRAPPYKKKGLFCNRTWDGWL CWDDTPAGRITAQNC PDYFPDF | 101 |           |
| <i>Apaloderma_vittatum</i>             | VIRQKIIDSQFKCYERMNRAPPYKKKGLFCNRTWDGWL CWDDTPAGRITAQNC PDYFPDF | 101 |           |
| <i>Balearica_regulorum_gibbericeps</i> | VIRQKIIDSQFKCYERMNRAPPYKKKGLFCNRTWDGWL CWDDTPAGRVTAQNC PDYFPDF | 101 |           |
| <i>Cuculus_canorus</i>                 | IIRQKIIDSQFKCYERMNRAPPYKKKGLFCNRTWDGWL CWDDTPAGRITAQNC PDYFPDF | 101 |           |
| <i>Caprimulgus_carolinensis</i>        | IIRQKIIDSQFKCYERMNRAPPYKKKGLFCNRTWDGWL CWDDTPAGRISAQNC PDYFPDF | 101 |           |
| <i>Calypte_anna</i>                    | VIRQKIIDSQFKCYERMNRAPPYKKKGLFCNRTWDGWL CWDDTPAGRIAAQNC PDYFPDF | 101 |           |
| <i>Pygoscelis_adeliae</i>              | VIRQKIIDSQFKCYERMNRAPPYKKKGLFCNRTWDGWL CWDDTPAGRITAQNC PDYFPDF | 101 |           |
| <i>Egretta_garzetta</i>                | VIRQKIIDSQFKCYERMNRAPPYKKKGLFCNRTWDGWL CWDDTPAGRITAQNC PDYFPDF | 101 |           |
| <i>Nipponia_nippon</i>                 | VIRQKIIDSQFKCYERMNRAPPYKKKGLFCNRTWDGWL CWDDTPAGRVTAQNC PDYFPDF | 101 |           |
| <i>Charadrius_vociferus</i>            | VIRQKIIDSQFKCYERMNRAPPYKKKGLFCNRTWDGWL CWDDTPAGRITAQNC PDYFPDF | 84  | mammals   |
| <i>Aquila_chrysaetos_canadensis</i>    | VIRQKIIDSQFKCYERMNRAPPYKKKGLFCNRTWDGWL CWDDTPAGRITAQNC PDYFPDF | 102 |           |
| <i>Phalacrocorax_carbo</i>             | VIRQKIIDSQFKCYERMNRAPPYKKKGLFCNRTWDGWL CWDDTPAGRITAQNC PDYFPDF | 84  |           |
| <i>Sus_scrofa</i>                      | LGRKRMLEAQHRCYDRMQKLPYPYQEGGLYCNRTWDGWL CWDDTPAGVLAEQYCPDYFPDF | 103 |           |
| <i>Mus_musculus</i>                    | VGRKKLLDAQYKCYDRIQQLPPYELEGEPYCNRTWDGWL CWDDTPAGATAYQHCPDYFPDF | 102 |           |
| <i>Rattus_norvegicus</i>               | VGRKKLLDAQYKCYDRIQQLPPYELEGEPYCNRTWDGWL CWDDTPAGVMSYQHCPDYFPDF | 119 |           |
| <i>Jaculus_jaculus</i>                 | VGRQKLIDAQYKCYHRMEQLPPYELEGEPYCNRTWDGWL CWDDTPAGVMAYQLCPDYFPDF | 103 |           |
| <i>Pteropus_vampyrus</i>               | IGRKKMMDAENKCYRRMQQLPPYQEGEPYCNRTWDGWL CWDDTPAGVVTQQHCPDYFPDF  | 103 |           |
| <i>Cavia_porcellus</i>                 | VGRKKLVDAQYRCYDRMQQLPPYELEGEPYCNRTWDGWL CWDDTPAGVLSVQLCPDYFPDF | 102 |           |
| <i>Galeopterus_variegatus</i>          | VGRKKLLEAQYKCYDRMQQLPPYELEGEPYCNRTWDGWL CWDDTPAGVMTYQFCPDYFPDF | 102 |           |
| <i>Oryctolagus_cuniculus</i>           | IGRKKLMDAQYKCYDRMEQLPPYQEGEPYCNRTWDGWL CWDDTPAGVLSFYQCPDYFPDF  | 119 |           |
| <i>Colobus_angolensis_palliatus</i>    | VGRKKMMDAQYKCYDRMQQLPPYQEGEPYCNRTWDGWL CWDDTPAGVLSYQFCPDYFPDF  | 102 |           |
| <i>Homo_sapiens</i>                    | VGRKKMMDAQYKCYDRMQQLPAYQEGEPYCNRTWDGWL CWDDTPAGVLSYQFCPDYFPDF  | 102 |           |
| <i>Pan_troglodytes</i>                 | VGRKKMMDAQYKCYDRMQQLPAYQEGEPYCNRTWDGWL CWDDTPAGVLSYQFCPDYFPDF  | 102 |           |
| <i>Canis_lupus_familiaris</i>          | LGRKKMSDAQYKCYDRMQQLPPYQEGEPYCNRTWDGWL CWDDTPAGVLSHQYCPDYFPDF  | 103 |           |
| <i>Equus_caballus</i>                  | LGRKKMMDAQYKCYDRMQQLPPYQEGEPYCNRTWDGWL CWDDTPAGVLSYQYCPDYFPDF  | 103 |           |
| <i>Ceratotherium_simum_simum</i>       | LGRKKMMDAQYKCYDRMQQLPPYQEGEPYCNRTWDGWL CWDDTPAGVLSHQYCPDYFPDF  | 103 |           |

::: ::: \*\*: ::: : . \* :\*.\*\*\*\*\* \*\*\*\*\* \* \*\*\*\*\* \*\*

|                                 |                                                               |     |           |
|---------------------------------|---------------------------------------------------------------|-----|-----------|
| Xenopus_tropicalis              | DPTERASKYCDENGNWFQHPESNRTWSNYTLNSFTSEKLMAYILYYMAIVGHALSIVS    | 170 | amphibian |
| Thamnophis_sirtalis             | DPTEIATKYCDKTGTWFRHPETNRTWSNYKRCNSFTNEKRKMIFIVYYMTIAGHVLMSVS  | 159 | reptiles  |
| Anolis_carolinensis             | DPTEIATKYCDKTGTWFRHPESNRTWSNYTRCNSFTNEKRKMVFILYYMTIVGHALSITS  | 161 |           |
| Serinus_canaria                 | DPTERASKYCDETGNWFRHPESNRTWSNYTLNSFTSEKLMKAFILYYMAIVGHALSITS   | 161 | aves      |
| Corvus_brachyrhynchos           | DPTERASKYCDETGNWFRHPESNRTWSNYTLNSFTSEKLMKAFILYYMAIVGHALSITS   | 161 |           |
| Ficedula_albicollis             | DPTERASKYCDETGNWFRHPESNRTWSNYTLNSFTSEKLMKAFILYYMAIVGHALSITS   | 161 |           |
| Anser_cygnoides_domesticus      | DPTERASKYCDETGNWFRHPESNRTWSNYTLNSFTSEKLMKAFILYYMAIVGHALSITS   | 161 |           |
| Anas_platyrhynchos              | DPTERASKYCDETGNWFRHPESNRTWSNYTLNSFTSEKLMKAFILYYMAIVGHALSITS   | 161 |           |
| Apteryx_australis_mantelli      | DPTERASKYCDETGNWFRHPESNRTWSNYTLNSFTSEKLMKAFILYYMAIVGHALSITS   | 161 |           |
| Gallus_gallus                   | DPTERASKYCDETGNWFRHPESNRTWSNYTLNSFTSEKLMKAFILYYMAIVGHALSITS   | 161 |           |
| Picoides_pubescens              | DPTERASKYCDETGNWFRHPESNRTWSNYTLNSFTSEKLMKAFILYYMAIVGHALSITS   | 161 |           |
| Chaetura_pelagica               | DPTERASKYCDENGNWFRHPESNRTWSNYTLNSFTSEKLMKAFILYYMAIVGHALSITS   | 161 |           |
| Apaloderma_vittatum             | DPTERASKYCDETGNWFRHPESNRTWSNYTLNSFTSEKLMKAFILYYMAIVGHALSITS   | 161 |           |
| Balearica_regulorum_gibbericeps | DPTERASKYCDETGNWFRHPESNRTWSNYTLNSFTSEKLMKAFILYYMAIVGHALSITS   | 161 |           |
| Cuculus_canorus                 | DPTERASKYCDETGNWFRHPESNRTWSNYTLNSFTSEKLMKAFILYYMAIVGHALSITS   | 161 |           |
| Caprimulgus_carolinensis        | DPTERASKYCDETGNWFRHPESNRTWSNYTLNSFTSEKLMKAFILYYMAIVGHALSITS   | 161 |           |
| Calypte_anna                    | DPTERASKYCDETGNWFRHPESNRTWSNYTLNSFTSEKLMKAFILYYMAIVGHALSITS   | 161 |           |
| Pygoscelis_adeliae              | DPTERASKYCDETGNWFRHPESNRTWSNYTLNSFTSEKLMKAFILYYMAIVGHALSITS   | 161 |           |
| Egretta_garzetta                | DPTERASKYCDETGNWFRHPESNRTWSNYTLNSFTSEKLMKAFILYYMAIVGHALSITS   | 161 |           |
| Nipponia_nippon                 | DPTERASKYCDETGNWFRHPESNRTWSNYTLNSFTSEKLMKAFILYYMAIVGHALSITS   | 161 |           |
| Charadrius_vociferus            | DPTERASKYCDETGNWFRHPESNRTWSNYTLNSFTSEKLMKAFILYYMAIVGHALSITS   | 144 |           |
| Aquila_chrysaetos_canadensis    | DPTERASKYCDETGNWFRHPESNRTWSNYTLNSFTSEKLMKAFILYYMAIVGHALSITS   | 162 |           |
| Phalacrocorax_carbo             | DPTERASKYCDETGNWFRHPESNRTWSNYTLNSFTSEKLMKAFILYYMAIVGHALSITS   | 144 |           |
| Sus_scrofa                      | DAAEKVTKYCGEDGDWYRHPESNISWSNYTMCNAFTPKLQNAVILYYLAIVGHLSLSILT  | 163 | mammals   |
| Mus_musculus                    | DTAEKVSKYCDENGEWFRHPDSNRTWSNYTMCNAFTPKLQNAVLYYLAIVGHLSLSIAA   | 162 |           |
| Rattus_norvegicus               | DPTEKVSKYCDENGEWFRHPDSNRTWSNYTMCNAFTPKLQNAVLYYLAIVGHLSLSIAA   | 179 |           |
| Jaculus_jaculus                 | DPAESVTKYCDENGDFKHPDSNRTWSNYTMCNAFTPKLQNAVLYYLAIVGHLSLSIFT    | 163 |           |
| Pteropus_vampyrus               | DPTEKATRYCDENGDWYKHPENKTWSNYSMCNAFTPEKLKNAYVLYYLAIVGHVSISAT   | 163 |           |
| Cavia_porcellus                 | DPTEKVTKYCDSEGVVFKHPENNRTWSNYTMCNAFTPEKLQNAVLYYLAIVGHMSISIT   | 162 |           |
| Galeopterus_variegatus          | DPTEKVTKYCDEKGVVFKHPENNRTWSNYTMCNAFTPEKLNNAYVLYYLAIVGHLSLSIFT | 162 |           |
| Oryctolagus_cuniculus           | DPTEKVTKYCDSEGVVFKHPGNQOTWSNYTMCNAFTPEKLQNAVLYYLAIVGHLSLSIFT  | 179 |           |
| Colobus_angolensis_palliatus    | DPSEKVTKYCDSEGVVFKHPENNRTWSNYTMCNAFTPEKLKNAYVLYYLAIVGHLSLSIFT | 162 |           |
| Homo_sapiens                    | DPSEKVTKYCDEKGVVFKHPENNRTWSNYTMCNAFTPEKLKNAYVLYYLAIVGHLSLSIFT | 162 |           |
| Pan_troglodytes                 | DPSEKVTKYCDEKGVVFKHPENNRTWSNYTMCNAFTPEKLKNAYVLYYLAIVGHLSLSIFT | 162 |           |
| Canis_lupus_familiaris          | DPSEKVTKYCDEKGDWYKHPENNRTWSNYTMCNAFTPEKLKNAYVLYYLAIVGHLSLSIFT | 163 |           |
| Equus_caballus                  | DPAEKVTKYCDEKGDWYKHPENNRTWSNYTMCNAFTPEKLKNAYVLYYLAIVGHLSLSIFT | 163 |           |
| Ceratotherium_simum_simum       | DPAEKVTKYCDEKGVVFKHPENNRTWSNYTMCNAFTPEKLKNAYVLYYLAIVGHLSLSIFT | 163 |           |

\* : \* . : : \* \* : \* \* : \* \* : \* \* \* \* . \* \* : \* \* : \* . : : \* \* : : \* \* : \* : \* .

|                                 |                                                  |     |           |
|---------------------------------|--------------------------------------------------|-----|-----------|
| Xenopus_tropicalis              | LMISLGIFFYFKSLSCQRITLHKNLFTSYVLNSVFTIVHLTAVVPD   | 230 | amphibian |
| Thamnophis_sirtalis             | LLISLGIFFYFKSLSCQRITLHKNLFCSYVLNSVFTLAHLIAIVPD   | 219 | reptiles  |
| Anolis_carolinensis             | LLISLGIFFYFKSLSCQRITLHKNLFFSYVLNSVFTLAHLIAVVS    | 221 |           |
| Serinus_canaria                 | LLISLAIFFYFKSLSCQRITLHKNLFFSYVLNSMFTIAHLIAVVP    | 221 | aves      |
| Corvus_brachyrhynchos           | LLISLAIFFYFKSLSCQRITLHKNLFFSYVLNSMFTIAHLIAVVP    | 221 |           |
| Ficedula_albicollis             | LLISLAIFFYFKSLSCQRITLHKNLFFSYVLNSMFTIAHLIVVVP    | 221 |           |
| Anser_cygnoides_domesticus      | LLISLAIFFYFKSLSCQRITLHKNLFFSYVLNSVFTIAHLIAVVP    | 221 |           |
| Anas_platyrhynchos              | LLISLAIFFYFKSLSCQRITLHKNLFFSYVLNSVFTIAHLIAVVP    | 221 |           |
| Apteryx_australis_mantelli      | LLISLAIFFYFKSLSCQRITLHKNLFFSYVLNSVFTIAHLIAVVP    | 221 |           |
| Gallus_gallus                   | LLISLAIFFYFKSLSCQRITLHKNLFFSYVLNSMFTIAHLIVVVP    | 221 |           |
| Picoides_pubescens              | LLISLAIFFYFKSLSCQRITLHKNLFFSYVLNSVFTIAHLIAVVP    | 221 |           |
| Chaetura_pelagica               | LLISLAIFFYFKSLSCQRITLHKNLFFSYVLNSVFTIAHLIAVVP    | 221 |           |
| Apaloderma_vittatum             | LLISLAIFFYFKSLSCQRITLHKNLFCSYVLNSVFTIAHLIAVVP    | 221 |           |
| Balearica_regulorum_gibbericeps | LLISLAIFFYFKSLSCQRITLHKNLFFSYVLNSMFTIAHLIAVVP    | 221 |           |
| Cuculus_canorus                 | LLISLAIFFYFKSLSCQRITLHKNLFFSYVLNSMFTIAHLIAVVP    | 221 |           |
| Caprimulgus_carolinensis        | LLISLAIFFYFKSLSCQRITLHKNLFFSYVLNSMFTIAHLIAVVP    | 221 |           |
| Calypte_anna                    | LLISLAIFFYFKSLSCQRITLHKNLFFSYVLNSMFTIAHLIAVVP    | 221 |           |
| Pygoscelis_adeliae              | LLISLAIFFYFKSLSCQRITLHKNLFFSYVLNSVFTIAHLIAVVP    | 221 |           |
| Egretta_garzetta                | LLISLAIFFYFKSLSCQRITLHKNLFFSYVLNSVFTIAHLIAVVP    | 221 |           |
| Nipponia_nippon                 | LLISLAIFFYFKSLSCQRITLHKNLFFSYVLNSVFTIAHLIAVVP    | 221 |           |
| Charadrius_vociferus            | LLISLAIFFYFKSLSCQRITLHKNLFFSYVLNSVFTIAHLIAVVP    | 204 |           |
| Aquila_chrysaetos_canadensis    | LLISLAIFFYFKSLSCQRITLHKNLFFSYVLNSMFTIAHLIAVVP    | 222 |           |
| Phalacrocorax_carbo             | LLISLAIFFYFKSLSCQRITLHKNLFFSYVLNSMFTIAHLIAVVP    | 204 |           |
| Sus_scrofa                      | LLISLGIFFMFLRSISLSCQRVTLHKNMFLTYVLSIIIIIVHLVVIVP | 223 | mammals   |
| Mus_musculus                    | LVASMLIFWIFKNSLSCQRVTLHKNMFLTYILNSIIIIIHLEVVVP   | 222 |           |
| Rattus_norvegicus               | LIASMGIFLFFKNLSCQRVTLHKNMFLTYILNSIIIIIHLEVVVP    | 239 |           |
| Jaculus_jaculus                 | LVISLGIFFVCFRSLSCQRVTLHKNMFLTYILNSMIIIIHLEVIP    | 223 |           |
| Pteropus_vampyrus               | LVISLGIFFMYFKSLGCQRVTLHKNMFLTYILNSMIIIIHLEVVVP   | 223 |           |
| Cavia_porcellus                 | LVVSLGIFFVYFRSLGCQRVTLHKNMFLTYILNSMIIIIHLEVVVP   | 222 |           |
| Galeopterus_variegatus          | LVISLGIFFMYRNLSCQRVTLHKNMFLTYILNSMIIIIHLEVVVP    | 222 |           |
| Oryctolagus_cuniculus           | LVISLGIFFMCFRSLGCQRVTLHKNMFLTYILNSMIIIIHLEVVVP   | 239 |           |
| Colobus_angolensis_palliatus    | LVISLGIFFVFFKSLGCQRVTLHKNMFLTYILNSMIIIIHLEVVVP   | 222 |           |
| Homo_sapiens                    | LVISLGIFFVFFRSLGCQRVTLHKNMFLTYILNSMIIIIHLEVVVP   | 222 |           |
| Pan_troglodytes                 | LVISLGIFFVFFRSLGCQRVTLHKNMFLTYILNSMIIIIHLEVVVP   | 222 |           |
| Canis_lupus_familiaris          | LVISLGIFFVFFKSLGCQRVTLHKNMFLTYILNSMIIIIHLEVVVP   | 223 |           |
| Equus_caballus                  | LVISLGIFFMFFKSLGCQRVTLHKNMFLTYILNSMIIIIHLEVVVP   | 223 |           |
| Ceratotherium_simum_simum       | LVISLGIFFVFFKSLGCQRVTLHKNMFLTYILNSMIIIIHLEVVVP   | 223 |           |

\*: \*: \*\* :.:.\*\*\*:\*\*\*\*.\*: \*:\*\*\*: : \*\* : : \*\* : \*\* \*

TMI

TMII

|                                 |                                                                |     |           |
|---------------------------------|----------------------------------------------------------------|-----|-----------|
| Xenopus_tropicalis              | QFFSQYMLGCNYFWMLCEGIYLHTLIVAVFAEEQRLHWYIYLLGWGFPLVPASIHAFART   | 290 | amphibian |
| Thamnophis_sirtalis             | QFFHQYTMGCNYFWMLCEGIYLHTLIVAVFAEEQRLHWYIYLLGWGFPLVPASIHAVARA   | 279 | reptiles  |
| Anolis_carolinensis             | QFFHQYMMGCNYFWMLCEGIYLHTLIVAVFAEEQRLHWYIYLLGWGFPLVPASIHAVART   | 281 |           |
| Serinus_canaria                 | QFFHQYMLGCNYFWMLCEGIYLHTLIVAVFAEEQRLHWYIYLLGWGFPLVPASIHAVARA   | 281 | aves      |
| Corvus_brachyrhynchos           | QFFHQYMLGCNYFWMLCEGIYLHTLIVAVFAEEQRLHWYIYLLGWGFPLVPASIHAVARA   | 281 |           |
| Ficedula_albicollis             | QFFHQYMLGCNYFWMLCEGIYLHTLIVAVFAEEQRLHWYIYLLGWGFPLVPASIHAVARA   | 281 |           |
| Anser_cygnoides_domesticus      | QFFHQYMLGCNYFWMLCEGIYLHTLIVAVFAEEQRLHWYIYLLGWGFPLVPASIHAVARA   | 281 |           |
| Anas_platyrhynchos              | QFFHQYMLGCNYFWMLCEGIYLHTLIVAVFAEEQRLHWYIYLLGWGFPLVPASIHAVARA   | 281 |           |
| Apteryx_australis_mantelli      | QFFHQYMLGCNYFWMLCEGIYLHTLIVAVFAEEQRLHWYIYLLGWGFPLVPASIHAIARA   | 281 |           |
| Gallus_gallus                   | QFFHQYMLGCNYFWMLCEGIYLHTLIVAVFAEEQRLHWYIYLLGWGFPLVPASIHAVARA   | 281 |           |
| Picoides_pubescens              | QFFHQYMLGCNYFWMLCEGIYLHTLIVAVFAEEQRLHWYIYLLGWGFPLVPASIHAVARA   | 281 |           |
| Chaetura_pelagica               | QFFHQYMLGCNYFWMLCEGIYLHTLIVAVFAEEQRLHWYIYLLGWGFPLVPASIHAIARA   | 281 |           |
| Apaloderma_vittatum             | QFFHQYMLGCNYFWMLCEGIYLHTLIVAVFAEEQRLHWYIYLLGWGFPLVPASIHAVARA   | 281 |           |
| Balearica_regulorum_gibbericeps | QFFHQYMLGCNYFWMLCEGIYLHTLIVAVFAEEQRLHWYIYLLGWGFPLVPASIHAVARA   | 281 |           |
| Cuculus_canorus                 | QFFHQYMLGCNYFWMLCEGIYLHTLIVAVFAEEQRLHWYIYLLGWGFPLVPASIHAVARA   | 281 |           |
| Caprimulgus_carolinensis        | QFFHQYMLGCNYFWMLCEGIYLHTLIVAVFAEEQRLHWYIYLLGWGFPLVPASIHAVARA   | 281 |           |
| Calypte_anna                    | QFFHQYMLGCNYFWMLCEGIYLHTLIVAVFAEEQRLHWYIYLLGWGFPLVPASIHAVARA   | 281 |           |
| Pygoscelis_adeliae              | QFFHQYMLGCNYFWMLCEGIYLHTLIVAVFAEEQRLHWYIYLLGWGFPLVPASIHAVARA   | 281 |           |
| Egretta_garzetta                | QFFHQYMLGCNYFWMLCEGIYLHTLIVAVFAEEQRLHWYIYLLGWGFPLVPASIHAVARA   | 281 |           |
| Nipponia_nippon                 | QFFHQYMLGCNYFWMLCEGIYLHTLIVAVFAEEQRLHWYIYLLGWGFPLVPASIHAVARA   | 281 |           |
| Charadrius_vociferus            | QFFHQYMLGCNYFWMLCEGIYLHTLIVAVFAEEQRLHWYIYLLGWGFPLVPASIHAVARA   | 264 |           |
| Aquila_chrysaetos_canadensis    | QFFHQYMLGCNYFWMLCEGIYLHTLIVAVFAEEQRLHWYIYLLGWGFPLVPASIHAVARA   | 282 | mammals   |
| Phalacrocorax_carbo             | QFFHQYMLGCNYFWMLCEGIYLHTLIVAVFAEEQRLHWYIYLLGWGFPLVPASIHAVARA   | 264 |           |
| Sus_scrofa                      | HFFHQYMMSCNYFWMLCEGVYLHTLIVSVFAEQRLWYIYLLGWGFPLIPTTAHAITRA     | 283 |           |
| Mus_musculus                    | HFLHQYMMSCNYFWMLCEGIYLHTLIVMAVFTDEQRLRWYIYLLGWGFPLVPTTIHAITRA  | 282 |           |
| Rattus_norvegicus               | HFFHQYMMACNYFWMLCEGIYLHTLIVMAVFTEDQRLRWYIYLLGWGFPLVPTTIHAITRA  | 299 |           |
| Jaculus_jaculus                 | HFFHQYMMACNYFWMLCEGIYLHTLIVSVFTEEQRLRYIYLLGWGFPLVPTTIHAITRA    | 283 |           |
| Pteropus_vampyrus               | HFFHQYMMACNYFWMLCEGIYLHTLIVAVFAEKQHRWYIYLLGWGFPLVPTTIHAVTRA    | 283 |           |
| Cavia_porcellus                 | HFFHQYMMACNYFWMLCEGIYLHTLIVSVFNEAKHLRWYIYLLGWGFPLVPTTIHAITRA   | 282 |           |
| Galeopterus_variegatus          | HFFHQYMMACNYFWMLCEGIYLHTLIVAVFSGEQHLRWYIYLLGWGFPLVPTTIHAITRA   | 282 |           |
| Oryctolagus_cuniculus           | HFFHQYMMSCNYFWMLCEGIYLHTLIVAVFAKQQLRWYIYLLGWGFPLVPTTIHAITRA    | 299 |           |
| Colobus_angolensis_palliatus    | HFFHQYMMACNYFWMLCEGIYLHTLIVMAVFTTEKQRLRWYIYLLGWGFPLVPTTIHAITRA | 282 |           |
| Homo_sapiens                    | HFFHQYMMACNYFWMLCEGIYLHTLIVAVFTEKQRLRWYIYLLGWGFPLVPTTIHAITRA   | 282 |           |
| Pan_troglodytes                 | HFFHQYMMACNYFWMLCEGIYLHTLIVAVFTEKQRLRWYIYLLGWGFPLVPTTIHAITRA   | 282 |           |
| Canis_lupus_familiaris          | HFFHQYMMACNYFWMLCEGIYLHTLIVAVFTEEQHLRWYIYLLGWGFPLVPTTIHAITRA   | 283 |           |
| Equus_caballus                  | HFFHQYMMACNYFWMLCEGIYLHTLIVAVFTEEQRLRWYIYLLGWGFPLVPTTIHAITRA   | 283 |           |
| Ceratotherium_simum_simum       | HFFHQYMMACNYFWMLCEGIYLHTLIVAVFTEEQRLRWYIYLLGWGFPLVPTTIHAITRA   | 283 |           |

\*: \* : .\*\*\*\*\*:\*\*\*\*\*: \*\* :: :\*.\*\*\*\*\*: : \*.\*.\*:

TMIII

TMIV



|                                 |                                                                |     |              |
|---------------------------------|----------------------------------------------------------------|-----|--------------|
| Xenopus_tropicalis              | KYFNDNCWMSVETHLLYIVHGPIAALLVNLFFLLNIVLVLVTKLRDTHRAESNMYMKAV    | 350 | } amphibians |
| Thamnophis_sirtalis             | RYFNDNCWISVDTYLLYIVHGPMVMAALLVNFFFLLNIVRVLVTKLRDTHRAESNMYMKAV  | 339 |              |
| Anolis_carolinensis             | KYFNDNCWISVDTLLLYVVHGPVMAALLVNFFFLLNIVRVLVTKLRDTHRAESNMYMKAV   | 341 | } reptiles   |
| Serinus_canaria                 | RYFNDNCWMSVDTLLLYIVHGPMVMAALLVNFFFLLNIVRVLVTKLRDTHRAESNMYMKAV  | 341 |              |
| Corvus_brachyrhynchos           | RYFNDNCWMSVDTYLLYIVHGPMVMAALLVNFFFLLNIVRVLVTKLRDTHRAESNMYMKAV  | 341 | } aves       |
| Ficedula_albicollis             | RYFNDNCWMSVDTLLLYIVHGPMVMAALLVNFFFLLNIVRVLVTKLRDTHRAESNMYMKAV  | 341 |              |
| Anser_cygnoides_domesticus      | KYFNDNCWMSVDTYLLYIVHGPMVMAALLVNFFFLLNIVRVLVTKLRDTHRAESNMYMKAV  | 341 |              |
| Anas_platyrhynchos              | KYFNDNCWMSVDTYLLYIVHGPMVMAALLVNFFFLLNIVRVLVTKLRDTHRAESNMYMKAV  | 341 |              |
| Apteryx_australis_mantelli      | KYFNDNCWMSVDTLLLYIVHGPMVMAALLVNFFFLLNIVRVLVTKLRDTHRAESNMYMKAV  | 341 |              |
| Gallus_gallus                   | KYFNDNCWMSVDTLLLYIVHGPMVMAALLVNFFFLLNIVRVLVTKLRDTHRAESNMYMKAV  | 341 |              |
| Picoides_pubescens              | KYFNDNCWMSVDTLLLYIVHGPMVMAALLVNFFFLLNIVRVLVTKLRDTHRAESNMYMKAV  | 341 |              |
| Chaetura_pelagica               | KYFNDNCWMSVDTLLLYIVHGPMVMAALLVNFFFLLNIVRVLVTKLRDTHRAESNMYMKAV  | 341 |              |
| Apaloderma_vittatum             | RYFNDNCWMSVDTLLLYIVHGPMVMAALLVNFFFLLNIVRVLVTKLRDTHRAESNMYMKAV  | 341 |              |
| Balearica_regulorum_gibbericeps | KYFNDNCWMSVDTLLLYIVHGPMVMAALLVNFFFLLNIVRVLVTKLRDTHRAESNMYMKAV  | 341 |              |
| Cuculus_canorus                 | KYFNDNCWMSVDTLLLYIVHGPMVMAALLVNFFFLLNIVRVLVTKLRDTHRAESNMYMKAV  | 341 |              |
| Caprimulgus_carolinensis        | KYFNDNCWMSVDTLLLYIVHGPMVMAALLVNFFFLLNIVRVLVTKLRDTHRAESNMYMKAV  | 341 |              |
| Calypte_anna                    | KYFNDNCWMSVDTLLLYIVHGPMVMAALLVNFFFLLNIVRVLVTKLRDTHRAESNMYMKAV  | 341 |              |
| Pygoscelis_adeliae              | RYFNDNCWMSVDTLLLYIVHGPMVMAALLVNFFFLLNIVRVLVTKLRDTHRAESNMYMKAV  | 341 |              |
| Egretta_garzetta                | RYFNDNCWMSVDTLLLYIVHGPMVMAALLVNFFFLLNIVRVLVTKLRDTHRAESNMYMKAV  | 341 |              |
| Nipponia_nippon                 | RYFNDNCWMSVDTLLLYIVHGPMVMAALLVNFFFLLNIVRVLVTKLRDTHRAESNMYMKAV  | 341 |              |
| Charadrius_vociferus            | KYFNDNCWMSVDTLLLYIVHGPMVMAALLVNFFFLLNIVRVLVTKLRDTHRAESNMYMKAV  | 324 |              |
| Aquila_chrysaetos_canadensis    | RYFNDNCWMSVDTLLLYIVHGPMVMAALLVNFFFLLNIVRVLVTKLRDTHRAESNMYMKAV  | 342 |              |
| Phalacrocorax_carbo             | RYFNDNCWMSVDTLLLYIVHGPMVMAALLVNFFFLLNIVRVLVTKLRDTHRAESNMYMKAV  | 324 |              |
| Sus_scrofa                      | VLFNDNCWLSVDTNLLYI IHGPMVMAALVNFFFLLNIVRVLVTKMLKESQEAESHMYLKAV | 343 | } mammals    |
| Mus_musculus                    | LYYNDNCWLSAETHLLYI IHGPMVMAALVNFFFLLNIVRVLVTKMRQTHEAESYMYLKAV  | 342 |              |
| Rattus_norvegicus               | VYYNDNCWLSVETHLLYI IHGPMVMAALVNFFFLLNIVRVLVTKMRQTHEAEAYMYLKAV  | 359 |              |
| Jaculus_jaculus                 | LYYDDNCWLSVETHLLYI IHGPMVMAALVNFFFLLNIVRVLVTKMRETHEAESHMYLKAV  | 343 |              |
| Pteropus_vampyrus               | LYFNDNCWLSVETYLLYI IHGPMVMAALVNFFFLLNIVRVLVKKMRETQEVDSHMYLKAV  | 343 |              |
| Cavia_porcellus                 | LYFNDNCWISVDTLLLYI IHGPMVMAALVNFFFLLNIVRVLVTKMRETHEAESYMYLKAV  | 342 |              |
| Galeopterus_variegatus          | LYFNDNCWLSVETHLLYI IHGPMVMAALVNFFFLLNIVRVLVTKMRETHEAESQMYLKAV  | 342 |              |
| Oryctolagus_cuniculus           | IYFNDNCWMSVETHLLYI IHGPMVMAALVNFFFLLNIVRVLVTKMRETHEAESHMYLKAV  | 359 |              |
| Colobus_angolensis_palliatus    | VYFNDNCWLSVETHLLYI IHGPMVMAALVNFFFLLNIVRVLVTKMRETHEAESHMYLKAV  | 342 |              |
| Homo_sapiens                    | VYFNDNCWLSVETHLLYI IHGPMVMAALVNFFFLLNIVRVLVTKMRETHEAESHMYLKAV  | 342 |              |
| Pan_troglodytes                 | VYFNDNCWLSVETHLLYI IHGPMVMAALVNFFFLLNIVRVLVTKMRETHEAESHMYLKAV  | 342 |              |
| Canis_lupus_familiaris          | LYFNDNCWLSVETHLLYI IHGPMVMAALVNFFFLLNIVRVLVSKMRETQEAESHMYLKAV  | 343 |              |
| Equus_caballus                  | LYFNDNCWLSVETHLLYI IHGPMVMAALVNFFFLLNIVRVLVSKMRETQEAESHMYLKAV  | 343 |              |
| Ceratotherium_simum_simum       | LYFNDNCWLSVETHLLYI IHGPMVMAALVNFFFLLNIVRVLVSKMRETQEAESHMYLKAV  | 343 |              |

:.\*\*\*\*:\*.\* \*\*::\*:\*\*.\* \*\*:\*:\*:\*\*\*\*\*: \*\*\*.\*::::.....: \*\*:\*\*\*

TMV

TMVI

|                                 |                                                                |     |              |
|---------------------------------|----------------------------------------------------------------|-----|--------------|
| Xenopus_tropicalis              | RATLILVPLLGIQFVIFPWRPDTRLAGEIYDYIMNILMHYQGLLVATIFCFFNGEVOGAL   | 410 | } amphibians |
| Thamnophis_sirtalis             | RATLILVPLLGIQFVIFPWRPENKLAGEIYDYIMHILMHYQGLLVATIFCFFNGEVOGTL   | 399 |              |
| Anolis_carolinensis             | RATLILVPLLGIQFVIIIPWRPENKLAGEVYDYIMHILMHYQGLLVATIFCFFNGEVOGAL  | 401 | } reptiles   |
| Serinus_canaria                 | RATLILVPLLGIQFVIIIPWRPENRLAGEIYDYIMHILMHYQGLLVATIFCFFNGEVOGAL  | 401 |              |
| Corvus_brachyrhynchos           | RATLILVPLLGIQFVIIIPWRPENRLAGEIYDYIMHILMHYQGLLVATIFCFFNGEVOGAL  | 401 | } aves       |
| Ficedula_albicollis             | RATLILVPLLGIQFVIIIPWRPENRLAGEIYDYIMHILMHYQGLLVATIFCFFNGEVOGAL  | 401 |              |
| Anser_cygnoides_domesticus      | RATLILVPLLGIQFVIIIPWRPENRLAGEIYDYIMHILMHYQGLLVATIFCFFNGEVOGAL  | 401 |              |
| Anas_platyrhynchos              | RATLILVPLLGIQFVIIIPWRPENRLAGEIYDYIMHILMHYQGLLVATIFCFFNGEVOGAL  | 401 |              |
| Apteryx_australis_mantelli      | RATLILVPLLGIQFVIIIPWRPENRLAGEIYDYIMHILMHYQGLLVATIFCFFNGEVOGAL  | 401 |              |
| Gallus_gallus                   | RATLILVPLLGIQFVIIIPWRPENRLAGEIYDYIMHILMHYQGLLVATIFCFFNGEVOGAL  | 401 |              |
| Picoides_pubescens              | RATLILVPLLGIQFVIIIPWRPENRLAGEIYDYIMHILMHYQGLLVATIFCFFNGEVOGAL  | 401 |              |
| Chaetura_pelagica               | RATLILVPLLGIQFVIIIPWRPENRLAGEIYDYIMHILMHYQGLLVATIFCFFNGEVOGAL  | 401 |              |
| Apaloderma_vittatum             | RATLILVPLLGIQFVIIIPWRPENRLAGEIYDYIMHILMHYQGLLVATIFCFFNGEVOGTL  | 401 |              |
| Balearica_regulorum_gibbericeps | RATLILVPLLGIQFVIIIPWRPENRLAGEIYDYIMHILMHYQGLLVATIFCFFNGEVOGAL  | 401 |              |
| Cuculus_canorus                 | RATLILVPLLGIQFVIIIPWRPENRLAGEIYDYIMHILMHYQGLLVATIFCFFNGEVOGAL  | 401 |              |
| Caprimulgus_carolinensis        | RATLILVPLLGIQFVIIIPWRPENRLAGEIYDYIMHILMHYQGLLVATIFCFFNGEVOGAL  | 401 |              |
| Calypte_anna                    | RATLILVPLLGIQFVIIIPWRPENRLAGEIYDYIMHILMHYQGLLVATIFCFFNGEVOGAL  | 401 |              |
| Pygoscelis_adeliae              | RATLILVPLLGIQFVIIIPWRPENRLAGEIYDYIMHILMHYQGLLVATIFCFFNGEVOGAL  | 401 |              |
| Egretta_garzetta                | RATLILVPLLGIQFVIIIPWRPENRLAGEIYDYIMHILMHYQGLLVATIFCFFNGEVOGAL  | 401 |              |
| Nipponia_nippon                 | RATLILVPLLGIQFVIIIPWRPENRLAGEIYDYIMHILMHYQGLLVATIFCFFNGEVOGAL  | 401 |              |
| Charadrius_vociferus            | RATLILVPLLGIQFVIIIPWRPENRLAGEIYDYIMHILMHYQGLLVATIFCFFNGEVOGAL  | 384 |              |
| Aquila_chrysaetos_canadensis    | RATLILVPLLGIQFVIIIPWRPENRLAGEIYDYIMHILMHYQGLLVATIFCFFNGEVOGAL  | 402 |              |
| Phalacrocorax_carbo             | RATLILVPLLGIQFVIIIPWRPENRLAGEIYDYIMHILMHYQGLLVATIFCFFNGEVOGAL  | 384 |              |
| Sus_scrofa                      | RATLILVPLLGVQFVVLPWRPSTPLLGKIYDYVVHSLIHFQGGFFVAIYCFCNHEVOGAL   | 403 | } mammals    |
| Mus_musculus                    | KATMVLVPLLGIQFVVFPWRPSPNKVLGKIYDYLHMSLIHFQGGFFVATYCFCNHEVQVTL  | 402 |              |
| Rattus_norvegicus               | KATMVLVPLLGIQFVVFPWRPSPNKVLGKIYDYLHMSLIHFQGGFFVATYCFCNHEVQVTL  | 419 |              |
| Jaculus_jaculus                 | KATMVLVPLLGIQFVVFPWRPSPNKILGKIYDYLHMSLIHFQGGFFVATYCFCNHEVQTTL  | 403 |              |
| Pteropus_vampyrus               | RATLILVPLLGIQFVVFPWRPSPNKVLGKIYDYLHMSLIHFQGGFFVAVIYCFYNSEVQTAV | 403 |              |
| Cavia_porcellus                 | KATMILVPLLGIQFVVFPWRPSPNKVLGKIYDYFMHSLIHFQGGFFVATYCFCNHEVQTTL  | 402 |              |
| Galeopterus_variegatus          | KATMILVPLLGIQFVVFPWRPSPNKILGKIYDYFMHSLIHFQGGFFVATYCFCNKEVQTTV  | 402 |              |
| Oryctolagus_cuniculus           | KATMILVPLLGIQFVVFPWRPSPNKILGKIYDYLHMSLIHFQGGFFVATYCFCNHEVQTTV  | 419 |              |
| Colobus_angolensis_palliatus    | KATMILVPLLGIQFVVFPWRPSPNKMLGKIYDYVMHSLIHFQGGFFVATYCFCNHEVQTTV  | 402 |              |
| Homo_sapiens                    | KATMILVPLLGIQFVVFPWRPSPNKMLGKIYDYVMHSLIHFQGGFFVATYCFCNHEVQTTV  | 402 |              |
| Pan_troglodytes                 | KATMILVPLLGIQFVVFPWRPSPNKMLGKIYDYVMHSLIHFQGGFFVATYCFCNHEVQTTV  | 402 |              |
| Canis_lupus_familiaris          | RATLILVPLLGIQFVVFPWRPSPNKMLGKIYDYLHMSLIHFQGGFFVAVIYCFCNHEVQTTV | 403 |              |
| Equus_caballus                  | RATLILVPLLGIQFVVFPWRPSPNKMLGKIYDYLHMSLIHFQGGFFVAMIYCFCNHEVQTTV | 403 |              |
| Ceratotherium_simum_simum       | RATLILVPLLGIQFVVFPWRPSPNKMLGKIYDYLHMSLIHFQGGFFVAMIYCFCNHEVQTTL | 403 |              |

\*\*\*:\*\*\*\*\*:\*\*\*:\*\*\*\*\*.. : \*:\*\*\*:.. \*:\*\*\*:\*\*\* \*\* \* \*\*\* ::

TMVI

TMVII

|                                 |                                                                 |     |           |
|---------------------------------|-----------------------------------------------------------------|-----|-----------|
| Xenopus_tropicalis              | KRQWMQYKTQWGQRRREHCSMRSTSYT-----ATSITEVPIYLYHHDNSNEQ--LN        | 459 | amphibian |
| Thamnophis_sirtalis             | KRQWMQYKTQWGQRRRDHCSTRSTSYT-----ATSITEVPVYLYHRDSNSEH--LN        | 448 |           |
| Anolis_carolinensis             | KRQWMQYKTQWGQRRREHCSSTRSTSYT-----ATSITEVPIYLYHHDSSSEQ--FN       | 450 | reptiles  |
| Serinus_canaria                 | KRQWAQYKTQWGQRRREHCSSTRSTSYT-----ATSITEVPVYLYHHDANNEH--LN       | 450 |           |
| Corvus_brachyrhynchos           | KRQWAQYKTQWGQRRREHCSSTRSTSYT-----ATSITEVPVYLYPHDANNEQ--LN       | 450 | aves      |
| Ficedula_albicollis             | KRQWTQYKTQWGQRRREHCSSTRSTSYT-----ATSITEVPVYLYHHDANNEQ--LN       | 450 |           |
| Anser_cygnoides_domesticus      | KRQWTQYKTQWGQRRREHCSSTRSTSYT-----ATSITEVPVYLYHHDNSNEQ--LN       | 450 |           |
| Anas_platyrhynchos              | KRQWTQYKTQWGQRRREHCSSTRSTSYT-----ATSITEVPVYLYHHDNSNEQ--LN       | 450 |           |
| Apteryx_australis_mantelli      | KRQWTQYKTQWGQRRREHCSSTRSTSYT-----ATSITEVPVYLYHHDNSNEQ--LN       | 450 |           |
| Gallus_gallus                   | KRQWTQYKTQWGQRRREHCSSTRSTSYT-----ATSITEVPVYLYHHDNSNEQ--LN       | 450 |           |
| Picoides_pubescens              | KRQWTQYKTQWGQRRREHCSSTRSTCT-----ATSI SEVPVYLYHHDNSNEQ--FN       | 450 |           |
| Chaetura_pelagica               | KRQWTQYKTQWGQRRREHCSSTRSTSYT-----ATSITEVPVYLYHRDSSNEQ--IN       | 450 |           |
| Apaloderma_vittatum             | KRQWTQYKAQWGQRRREHCSSTRSTSYT-----ATSITEVPIYLYHHESNEQ--LN        | 450 |           |
| Balearica_regulorum_gibbericeps | KRQWTQYKTQWGQRRREHCSSTRSTSYT-----ATSITEVPVYLYHHDNSNEQ--LN       | 450 |           |
| Cuculus_canorus                 | KRQWTQYKTQWGQRRREHCSSTRSTSYT-----ATSITEVPVYLYHHDNSNEQ--LN       | 450 |           |
| Caprimulgus_carolinensis        | KRQWTQYKTQWGQRRREHCSSTRSTSYT-----ATSITEVPVYLFHHDNSNEQ--LN       | 450 |           |
| Calypte_anna                    | KRQWTQYKTQWGQRRREHCSSTRSTSYT-----ATSITEVPVYLYHHDNSNEQ--LN       | 450 |           |
| Pygoscelis_adeliae              | KRQWAQYKTQWGQRRREHCSSTRSTSYT-----ATSITEVPVYLYHHDSTNEQ--LN       | 450 |           |
| Egretta_garzetta                | KRQWTQYKTQWGQRRREHCSSTRSTSYT-----ATSITELPVYLYHHDNSNEQ--LN       | 450 |           |
| Nipponia_nippon                 | KRQWTQYKTQWGQRRREHCSSTRSTSYT-----ATSITEVPVYLYHHDNSNEQ--LN       | 450 |           |
| Charadrius_vociferus            | KRQWTQYKTQWGQRRREHCSSTRSTSYT-----ATSITEVPVYLYHHDNSNEQ--LN       | 433 |           |
| Aquila_chrysaetos_canadensis    | KRQWTQYKTQWGQRRREHCSSTRSTSYT-----ATSITEVPVYLYHHDNSNEQ--LN       | 451 |           |
| Phalacrocorax_carbo             | KRQWTQYKTQWGQRRREHCSSTRSTSYT-----ATSITEVPVYLYHHDNSNEQ--LN       | 433 |           |
| Sus_scrofa                      | KRQWNQYQAQ---RWAGRSTRANAATAAAAAAALAEITVEIPVYICHQEPREPAGEE       | 460 | mammals   |
| Mus_musculus                    | KRQWTQFKIQWSQRWGR--RPTN---RVVSAPRAVAFAEPDGLPIYICHQEPR--NPPISN   | 457 |           |
| Rattus_norvegicus               | KRQWAQFKIQWSHRWGRRRRPTN---RVVSAPRAVAFAEPGGLPIYICHQEPR--NPPVSN   | 475 |           |
| Jaculus_jaculus                 | KRQWTQFKLQ---HWGTALTNRTAP--QASPAATASAEAGDIDLPIYICHREPPRA----N   | 455 |           |
| Pteropus_vampyrus               | KRQWIQFKIQWDQRRGGRNHRPHF--HAATAAAAAAEAEAGDIPVYICHQEPR--NNEPAI   | 461 |           |
| Cavia_porcellus                 | KRQWAQFKIQWNQRWGTRPSNRSAA--A--RAAAAAAEAGDNIPIYICHQE--PRNDPPN    | 457 |           |
| Galeopterus_variegatus          | KRHWAQLRIQWDQRWGPRPSARSTA--R--AA--A---SAEAGDIPVYICHPEPEPRNEPAG  | 455 |           |
| Oryctolagus_cuniculus           | KRQWVQFKIQWNQRWGRRPAHRSVS--R--TA--A---SAEAGDIPVYIYHQE--PRNDQAH  | 470 |           |
| Colobus_angolensis_palliatus    | KRQWVQFKIQWNQRWGRRPSNRSAA--R--AA--A---AAEAGDIPVYICHQE--PRNEPAN  | 452 |           |
| Homo_sapiens                    | KRQWAQFKIQWNQRWGRRPSNRSAA--R--AAAA---AAEAGDIPVYIYICHQE--LRNEPAN | 453 |           |
| Pan_troglodytes                 | KRQWAQFKIQWNQRWGRRPSNRSAA--R--AAAA---AAEAGDIPVYIYICHQE--PRNEPAN | 453 |           |
| Canis_lupus_familiaris          | KRQWAQFKTQWDQRWGRRNPRRSAA--S--AAAA---AAEAGDIPVYICHQE--PRNEAAN   | 455 |           |
| Equus_caballus                  | KRHWAQFKTQWNQRWGRRTNNRSIS----NAAA---SAEAGDIPVYICHQE--PRNELAN    | 454 |           |
| Ceratotherium_simum_simum       | KRHWAQFKTQWNQRWGRRSNNRSIS----NAAA---AAGARDIPVYICHQE--PRNEPAN    | 454 |           |

\*\*:\* \* : \* : : : \* : \* : \*



|                                 |                           |     |           |
|---------------------------------|---------------------------|-----|-----------|
| Xenopus_tropicalis              | -GKYGDESEITALNSG--DTYA    | 478 | amphibian |
| Thamnophis_sirtalis             | -GKYIHDSELVALKSG--ETSA    | 467 | reptiles  |
| Anolis_carolinensis             | -GKYIDDSELVALKSG--ETSA    | 469 |           |
| Serinus_canaria                 | -GRYVEDSELVALKSG--DTSA    | 469 |           |
| Corvus_brachyrhynchos           | -GRYVEDSELVALKSG--ETSA    | 469 |           |
| Ficedula_albicollis             | -GRYLEDSELVALKSG--ETSA    | 469 |           |
| Anser_cygnoides_domesticus      | -GRYIDDSELVALKSG--ETSA    | 469 |           |
| Anas_platyrhynchos              | -GRYIDDSELVALKSG--ETSA    | 469 |           |
| Apteryx_australis_mantelli      | -GRYIDDSELVALKSG--ETSA    | 469 | aves      |
| Gallus_gallus                   | -GRYVDDSELVALKSG--ETSA    | 469 |           |
| Picoides_pubescens              | -GRYTEDESELVALKSG--ETSA   | 469 |           |
| Chaetura_pelagica               | -GRYIEDSELVALKSG--ETSA    | 469 |           |
| Apaloderma_vittatum             | -GRYVEDSELVALKSG--ETSA    | 469 |           |
| Balearica_regulorum_gibbericeps | -GRYIEDSELVALKSG--ETSA    | 469 |           |
| Cuculus_canorus                 | -GRYVEDSELVALKSG--ETSA    | 469 |           |
| Caprimulgus_carolinensis        | -GRYVEDSELVALKPG--ETSA    | 469 |           |
| Calypte_anna                    | -GRYTEDESELVALKSG--ETSA   | 469 |           |
| Pygoscelis_adeliae              | -GRYIEDSELVALKSG--ETSA    | 469 |           |
| Egretta_garzetta                | -GRYIEDSELVALKSG--ETSA    | 469 |           |
| Nipponia_nippon                 | -GRYAEDSELVALKSG--ETSA    | 469 |           |
| Charadrius_vociferus            | -GRYVEDSELVALKSG--ETSA    | 452 |           |
| Aquila_chrysaetos_canadensis    | -GRYVEDSELVALKSG--ETSA    | 470 |           |
| Phalacrocorax_carbo             | -GRYVEDSELVALKSG--ETSA    | 452 |           |
| Sus_scrofa                      | PVVEVEGVVEVIAMEVLEQETSA   | 482 | mammals   |
| Mus_musculus                    | -NEGEESTEMIPMNVIQQDASA    | 478 |           |
| Rattus_norvegicus               | -NEGEEGTEMIPMNVIQQDSSA    | 496 |           |
| Jaculus_jaculus                 | -NQVLEGAEI I PLNTVEQESSA  | 476 |           |
| Pteropus_vampyrus               | -NLGEEGAEDIPMEI IEQESCA   | 482 |           |
| Cavia_porcellus                 | -NQGEEGAEMIVLNI IEKESSA   | 478 |           |
| Galeopterus_variegatus          | -NEGERGAELIPLNI IEHESSA   | 476 |           |
| Oryctolagus_cuniculus           | -SLGEEGAEI I PLNI IEQESSA | 491 |           |
| Colobus_angolensis_palliatus    | -NQGEESAEI I PLNI IEQETSA | 473 |           |
| Homo_sapiens                    | -NQGEESAEI I PLNI IEQESSA | 474 |           |
| Pan_troglodytes                 | -NQGEESAEI I PLNI IEQESSA | 474 |           |
| Canis_lupus_familiaris          | -NLGEEGAEVIALEI IEQESSA   | 476 |           |
| Equus_caballus                  | -NLGGEGAEVIALEI IEQESSA   | 475 |           |
| Ceratotherium_simum_simum       | -NLGGEGAEVIALEI IEQESSA   | 475 |           |

\*    ::    :: \*
